# Supplementary material for: A Seven-Year Microbiological and Molecular Study of Bacteremias Due to Carbapenemase-Producing Klebsiella Pneumoniae: An Interrupted Time-Series Analysis of Changes in the Carbapenemase Gene’s Distribution after Introduction of Ceftazidime/Avibactam
Source: MDPI journal article supplement (doi:10.3390/antibiotics11101414), 2022-10-14
Supplement: s1 [file s1]

**Supplementary Table S1.** MIC distribution and susceptibility of 499 carbapenemase-producing *K. pneumoniae* isolates to different antimicrobials according to EUCAST guidelines

| Antibiotics                        | MIC (mg/L) |       |       |       |      |      |     |      |    |     |    |    |    |     |     |     | EUCAST |            |            |
|------------------------------------|------------|-------|-------|-------|------|------|-----|------|----|-----|----|----|----|-----|-----|-----|--------|------------|------------|
|                                    | 0.032      | 0.064 | 0.094 | 0.125 | 0.25 | 0.38 | 0.5 | 0.75 | 1  | 1.5 | 2  | 3  | 4  | 6   | 8   | 12  | 32     | S (%)      | R (%)      |
|                                    |            |       |       |       |      |      |     |      |    |     |    |    |    |     |     |     |        |            |            |
| Colistin                           |            | 3     | 1     | 18    | 36   | 10   | 91  | 38   | 64 | 41  | 46 | 14 | 21 | 14  | 25  | 66  | 11     | 348 (69.7) | 151 (30.3) |
| Tigecycline                        |            | 1     |       | 4     | 21   | 24   | 54  | 63   | 86 | 60  | 83 | 26 | 32 | 12  | 23  | 13  | 6      | 104 (20.8) | 395 (79.2) |
| Ceftazidime/avibactam <sup>a</sup> | 9          | 4     | 2     | 7     | 7    | 19   | 33  | 18   | 8  | 6   | 1  | 1  | 4  | 1   |     |     | 15     | 118 (88.7) | 15 (11.2)  |
|                                    | 1          | 2     | 3     | 4     | 6    | 8    | 12  | 16   | 24 | 32  | 48 | 64 | 96 | 128 | 256 | 512 | 1024   | S (%)      | R (%)      |
| Fosfomycin <sup>b</sup>            |            | 5     | 4     | 6     | 6    | 18   | 31  | 30   | 18 | 27  | 9  | 12 | 6  | 7   | 4   | 2   | 32     | 145 (66.8) | 72 (33.2)  |

Resistant isolates according to EUCAST appear in italics

<sup>a</sup>Only for 133 *K. pneumoniae* isolates of 2018-19 carrying *blaKPC*

<sup>b</sup>Only for 217 *K. pneumoniae* isolates
