# Supplementary material for: A Seven-Year Microbiological and Molecular Study of Bacteremias Due to Carbapenemase-Producing Klebsiella Pneumoniae: An Interrupted Time-Series Analysis of Changes in the Carbapenemase Gene’s Distribution after Introduction of Ceftazidime/Avibactam
Source: MDPI journal article supplement (doi:10.3390/antibiotics11101414), 2022-10-14
Supplement: s1 [file s1]

**Supplementary Table S2.** Distribution of *K. pneumoniae* BSIs according to hospital department and presence of carbapenemase genes.

| Species                                                 | All<br>(n=632) | Emergency room<br>(n=54; 8.5%) | Medical wards<br>(n=163; 25.8%) | Haematology wards<br>(n=74; 11.7%) | Surgical wards<br>(n=108; 17.1%) | ICU<br>(n=210; 33.2%) | Pediatric wards <sup>a</sup><br>(n=23; 3.6%) |
|---------------------------------------------------------|----------------|--------------------------------|---------------------------------|------------------------------------|----------------------------------|-----------------------|----------------------------------------------|
| Carbapenem-susceptible                                  | 133 (21.0%)    | 25 (46.3%)                     | 50 (30.7%)                      | 14 (18.9%)                         | 26 (24.1%)                       | 9 (4.4%)              | 9 (39.1%)                                    |
| Carbapenem-resistant                                    | 499 (79.0%)    | 29 (53.7%)                     | 113 (69.3%)                     | 60 (81.1%)                         | 82 (75.9%)                       | 201 (95.6%)           | 14 (60.9%)                                   |
| <i>bla</i> <sub>KPC</sub>                               | 384 (60.8%)    | 24 (44.4%)                     | 81 (49.7%)                      | 58 (78.4%)                         | 59 (54.6%)                       | 148 (70.5%)           | 14 (60.9%)                                   |
| <i>bla</i> <sub>NDM</sub>                               | 61 (9.7%)      | 5 (9.3%)                       | 24 (14.7%)                      | 2 (2.7%)                           | 12 (11.1%)                       | 18 (8.6%)             | 0 (0.0%)                                     |
| <i>bla</i> <sub>VIM</sub>                               | 39 (6.2%)      | 0 (0.0%)                       | 4 (2.5%)                        | 0 (0.0%)                           | 10 (9.3%)                        | 25 (11.9%)            | 0 (0.0%)                                     |
| <i>bla</i> <sub>KPC</sub> and <i>bla</i> <sub>VIM</sub> | 12 (1.9%)      | 0 (0.0%)                       | 2 (1.2%)                        | 0 (0.0%)                           | 1 (0.9%)                         | 9 (4.3%)              | 0 (0.0%)                                     |
| <i>bla</i> <sub>NDM</sub> and <i>bla</i> <sub>VIM</sub> | 3 (0.5%)       | 0 (0.0%)                       | 2 (1.2%)                        | 0 (0.0%)                           | 0 (0.0%)                         | 1 (0.5%)              | 0 (0.0%)                                     |

ICU: Intensive Care Unit

<sup>a</sup>including neonatal and paediatric ICU
